# Supplementary material for: Tuning the mechanical properties of functionally graded nickel and aluminium alloy at the nanoscale
Source: Royal Society of Chemistry journal article supplement (doi:10.1039/d1ra04571g), 2021-01-01
Supplement: d1ra04571g1.pdf [file d1ra04571g1.pdf]

## Tuning the Mechanical Properties of Functionally Graded Nickel and Aluminium Alloy at the Nanoscale

Shailee Mitra<sup>1</sup>, Md. Habibur Rahman<sup>1</sup>, Mohammad Motalab<sup>1\*</sup>, Tawfiqur Rakib<sup>2</sup>, Pritom Bose<sup>1</sup>

<sup>1</sup>Department of Mechanical Engineering, Bangladesh University of Engineering and Technology, Dhaka-1000, Bangladesh

<sup>2</sup>Department of Mechanical Science and Engineering, University of Illinois at Urbana-Champaign, Urbana, IL 61801, United States

\*Corresponding Author. E-mail address: [abdulmotalab@me.buet.ac.bd](mailto:abdulmotalab@me.buet.ac.bd)

### Supporting Information

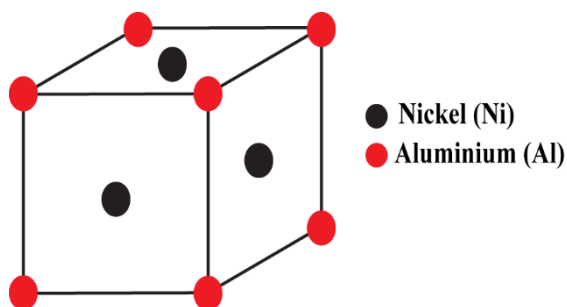

Fig. S1. Ni<sub>3</sub>Al (L<sub>12</sub>) crystal structure

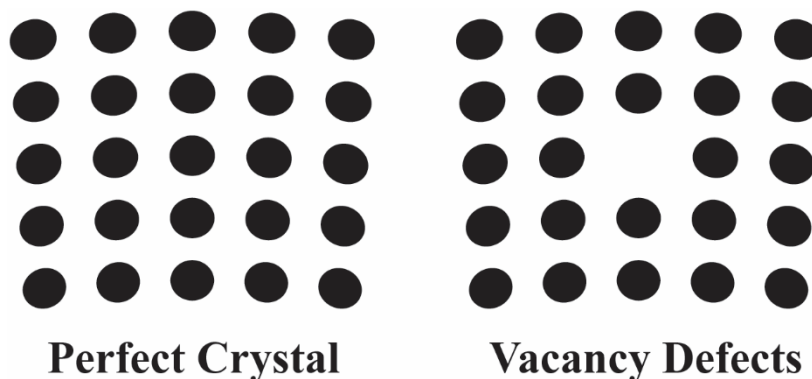

Fig. S2. Illustration of perfect crystal and crystal with vacancy defects
